# Supplementary material for: Enterovirus infections in pediatric patients hospitalized with acute gastroenteritis in Chiang Mai, Thailand, 2015–2018
Source: PeerJ. 2020 Aug 17;8:e9645. doi: 10.7717/peerj.9645 (PMC7439955; doi:10.7717/peerj.9645)
Supplement: File S1 [file peerj-08-9645-s001.xlsx]

## Sheet: Sheet1
	Enterovirus detecion from January 2015 to December 2018
	Year 2015	Jan	Feb	Mar	Apr	May	Jun	Jul	Aug	Sep	Oct	Nov	Dec	Total
	Total cases	11	32	17	34	15	47	35	29	24	36	13	42	335
	EV positive cases	2	3	0	1	1	1	7	2	3	2	0	2	24
	Percent EV positive	18.1818	9.375	0	2.94118	6.66667	2.12766	20	6.89655	12.5	5.55556	0	4.7619	7.16418
	Year 2016	Jan	Feb	Mar	Apr	May	Jun	Jul	Aug	Sep	Oct	Nov	Dec	Total
	Total cases	79	70	88	30	39	14	55	33	42	9	10	40	509
	EV positive cases	2	6	5	7	2	2	9	7	0	1	1	4	46
	Percent EV positive	2.53165	8.57143	5.68182	23.3333	5.12821	14.2857	16.3636	21.2121	0	11.1111	10	10	9.03733
	Year 2017	Jan	Feb	Mar	Apr	May	Jun	Jul	Aug	Sep	Oct	Nov	Dec	Total
	Total cases	12	23	6	37	8	26	14	49	16	43	32	12	278
	EV positive cases	0	1	0	1	0	2	0	10	1	11	5	0	31
	Percent EV positive	0	4.34783	0	2.7027	0	7.69231	0	20.4082	6.25	25.5814	15.625	0	11.1511
	Year 2018	Jan	Feb	Mar	Apr	May	Jun	Jul	Aug	Sep	Oct	Nov	Dec	Total
	Total cases	112	82	91	57	52	41	32	23	24	58	32	10	614
	EV positive cases	3	5	4	4	2	5	5	5	6	7	7	0	53
	Percent EV positive	2.67857	6.09756	4.3956	7.01754	3.84615	12.1951	15.625	21.7391	25	12.069	21.875	0	8.63192
	4 years	Jan	Feb	Mar	Apr	May	Jun	Jul	Aug	Sep	Oct	Nov	Dec	Total
	Total cases	214	207	202	158	114	128	136	134	106	146	87	104	1736
	EV positive cases	7	15	9	13	5	10	21	24	10	21	13	6	154
	Percent EV positive	3.27103	7.24638	4.45545	8.22785	4.38596	7.8125	15.4412	17.9104	9.43396	14.3836	14.9425	5.76923	8.87097
